# Supplementary material for: Genome-Wide Identification of WRKY Gene Family and Functional Characterization of CcWRKY25 in Capsicum chinense
Source: MDPI journal article supplement (doi:10.3390/ijms241411389), 2023-07-13
Supplement: s1 [file s1]

**Table S1 Primer sequences**

| Primer                 | Sequence (5'-3')                                   | T <sub>m</sub> /°C | Use            |
|------------------------|----------------------------------------------------|--------------------|----------------|
| <i>CcActin</i> -QF     | GTCCATCTGCTCTCTGTTG                                | 58                 | qRT-PCR        |
| <i>CcActin</i> -QR     | CACCCCAAGCACAATAAGAC                               | 58                 | qRT-PCR        |
| <i>CA06g13580</i> -QF  | TCCAAAACCTCTAAATAGTCCCCA                           | 58                 | qRT-PCR        |
| <i>CA06g13580</i> -QR  | CCGACCACCATTACTATCACCC                             | 58                 | qRT-PCR        |
| <i>CA07g10930</i> -QF  | CTGGAAGATGGTTACAGATGGAGA                           | 58                 | qRT-PCR        |
| <i>CA07g10930</i> -QR  | TCGGCAAAGGGAAGGCAC                                 | 58                 | qRT-PCR        |
| <i>CcWRKY25</i> -F     | ACTCCAAACAAAACCAAGTCAAAAC                          | 60.5               | Clone          |
| <i>CcWRKY25</i> -R     | CGACTTGTGCTCCTTTCATTACC                            | 60.5               | Clone          |
| <i>CcWRKY25Q</i> -F    | ATTATCAAGAGCCCACAAAGCA                             | 58                 | qRT-PCR        |
| <i>CcWRKY25Q</i> -R    | TACCTTTTACTTGTCTTCTGCCCAT                          | 58                 | qRT-PCR        |
| pB: <i>CcWRKY25</i> -F | gagaacacgggggactctagaATGGCTGCTCAAGTTTCTCAT<br>TTC  | 60.5               | Overexpression |
| pB: <i>CcWRKY25</i> -R | gagaacacgggggactctagaTCAGCAAAGCAATGACTCCAT<br>AAAC | 60.5               | Overexpression |
| <i>AtActin</i> -QF     | TCGCTGACCGTATGAGCAAAG                              | 57                 | qRT-PCR        |
| <i>AtActin</i> -QR     | TGTGAACGATTCTGGACCTG                               | 57                 | qRT-PCR        |
| <i>AtPAL2</i> -QF      | AGACAAAAGTGGCGGTTACTACG                            | 57                 | qRT-PCR        |
| <i>AtPAL2</i> -QR      | TAACGCTGCCTCCTACGGT                                | 57                 | qRT-PCR        |
| <i>AtPAL4</i> -QF      | GAAATCACTCCGTGCCTCCC                               | 57                 | qRT-PCR        |
| <i>AtPAL4</i> -QR      | CAGACATAACTTCGGATAAAACAGC                          | 57                 | qRT-PCR        |
| <i>AtC4H</i> -QF       | TCTCAACCACCGTAATCTCGTC                             | 57                 | qRT-PCR        |
| <i>AtC4H</i> -QR       | CCAATGCTCGCCGTAAACA                                | 57                 | qRT-PCR        |
| <i>At4CL1</i> -QF      | GAACCCGAATCTTTATTTCCACAG                           | 57                 | qRT-PCR        |
| <i>At4CL1</i> -QR      | GCCACCGTCACTTACACCTC                               | 57                 | qRT-PCR        |
| <i>At4CL2</i> -QF      | TGAAAGGCTATCTCAATGACCC                             | 57                 | qRT-PCR        |
| <i>At4CL2</i> -QR      | TGGCGACGACAGCAACAT                                 | 57                 | qRT-PCR        |
| <i>At4CL3</i> -QF      | CCGTCGTCTCCGATGATGT                                | 57                 | qRT-PCR        |
| <i>At4CL3</i> -QR      | TGTTTCGCCGTAGGTGTAGC                               | 57                 | qRT-PCR        |
| <i>At4CL5</i> -QF      | TTGCCGTGCTTACCTTGG                                 | 57                 | qRT-PCR        |
| <i>At4CL5</i> -QR      | CGTTGTCACCGTCATCGTCTAG                             | 57                 | qRT-PCR        |
| <i>AtCHI</i> -QF       | CTCTTACGGTTGCGTTTTTCG                              | 57                 | qRT-PCR        |
| <i>AtCHI</i> -QR       | CGTCCTTGTTCTTCATCATTAGC                            | 57                 | qRT-PCR        |
| <i>AtCHS</i> -QF       | CGTGTCTCGTTGTCTGCTC                                | 57                 | qRT-PCR        |
| <i>AtCHS</i> -QR       | CCTCAAATGTCCGTCTATGGC                              | 57                 | qRT-PCR        |
| <i>AtF3H</i> -QF       | ATCATCGGAAACCTCCCTCA                               | 57                 | qRT-PCR        |
| <i>AtF3H</i> -QR       | GCGAAATTGGCGTCGTGTAT                               | 57                 | qRT-PCR        |
| <i>AtFLS1</i> -QF      | TCCCCGTGAAAAGATTGTTG                               | 57                 | qRT-PCR        |
| <i>AtFLS1</i> -QR      | CTTGCGGTAACGTGAATCCTTGA                            | 57                 | qRT-PCR        |
| <i>AtC3H</i> -QF       | GATGGACACGACAGCGATAACA                             | 57                 | qRT-PCR        |
| <i>AtC3H</i> -QR       | GCAAGTAAGGTAAGCGGGAGAA                             | 57                 | qRT-PCR        |
| <i>AtCAD1</i> -QF      | TAAAGGAGGCTACTCTAGTCACATTG                         | 57                 | qRT-PCR        |
| <i>AtCAD1</i> -QR      | ACGCATCATAGGAGCATAAACCC                            | 57                 | qRT-PCR        |

| Primer                 | Sequence (5'-3')                     | Tm/°C | Use     |
|------------------------|--------------------------------------|-------|---------|
| <i>AtCAD2</i> -QF      | GGCTTGGTGCTGATTTCGTT                 | 57    | qRT-PCR |
| <i>AtCAD2</i> -QR      | TCCAATCTGACTTCCTCCCAC                | 57    | qRT-PCR |
| <i>AtCAD3</i> -QF      | TCGGTGCTGATTCGTTTCTT                 | 57    | qRT-PCR |
| <i>AtCAD3</i> -QR      | TCCAATCTGACTTCCTCCCAC                | 57    | qRT-PCR |
| <i>AtCCR1</i> -QF      | TCCATTGGTGCCGTCTACAT                 | 57    | qRT-PCR |
| <i>AtCCR1</i> -QR      | CGTGGTAAAGACTGGCGTTG                 | 57    | qRT-PCR |
| <i>AtCCOAOMT</i> -QF   | CAAAATCAAGCTACGTCAACTTCC             | 57    | qRT-PCR |
| <i>AtCCOAOMT</i> -QR   | CGCCACAAAACCAAACCAC                  | 57    | qRT-PCR |
| <i>AtCOMT</i> -QF      | GTTGGTGGTGGCATTGGTG                  | 57    | qRT-PCR |
| <i>AtCOMT</i> -QR      | CCTCTGGAAGTGACTCGTAGCA               | 57    | qRT-PCR |
| <i>AtHCT</i> -QF       | CCACCGAGACACCAATCACTA                | 57    | qRT-PCR |
| <i>AtHCT</i> -QR       | GAACACCAGCACCGTTACAATC               | 57    | qRT-PC  |
| pT: <i>CcWRKY25</i> -F | gtgagtaaggttaccTTCTTTCACCGACCTTCTTGC | 60    | VIGS    |
| pT: <i>CcWRKY25</i> -R | cgtgagctcggtaccCATCCTGCTTTGTGGGCTCT  | 60    | VIGS    |
| <i>CcAT3</i> -F        | GCTTACAAGGACAGCGGCA                  | 58    | qRT-PCR |
| <i>CcAT3</i> -R        | GAAGGAAGTTGAGGTGGCATAACA             | 58    | qRT-PCR |
| <i>CcKAS</i> -F        | TCGGCTATTGGTGTGGTGGT                 | 58    | qRT-PCR |
| <i>CcKAS</i> -R        | CACCTCCCAAGTATTCGGCTA                | 58    | qRT-PCR |
| <i>CcBCAT</i> -F       | TTCAAGGAAGGAACAGCACCA                | 58    | qRT-PCR |
| <i>CcBCAT</i> -R       | TATCCGTTCCGCTTTGCTTT                 | 58    | qRT-PCR |
| <i>CcPAMT</i> -F       | TGGATTTGGAAGACTTGGGACA               | 58    | qRT-PCR |
| <i>CcPAMT</i> -R       | GCTTACAAGGACAGCGGCA                  | 58    | qRT-PCR |
| <i>CcPAL</i> -F        | TGTCCCGTTGTCCTACATTGCT               | 58    | qRT-PCR |
| <i>CcPAL</i> -R        | CTCGGGCTTTCCATTTCATCAC               | 58    | qRT-PCR |
| <i>CcCA4H</i> -F       | TCGGTGTTGGTAGGAGGAGTTG               | 58    | qRT-PCR |
| <i>CcCA4H</i> -R       | TGCCCTGGAGGAGGAAACA                  | 58    | qRT-PCR |
| <i>Cc4CL</i> -F        | CTTCTTCTCAACCATCCCAACA               | 58    | qRT-PCR |
| <i>Cc4CL</i> -R        | ACGAAATCCTTGACTTCATCCTC              | 58    | qRT-PCR |
| <i>CcCOMT</i> -F       | TAGCACATAAACCAGGAGGCA                | 58    | qRT-PCR |
| <i>CcCOMT</i> -R       | CACAGCACACCTTACGGAATCT               | 58    | qRT-PCR |
| <i>CcCS</i> -QF        | TTGGCTCGCGTATAATGACTT                | 58    | qRT-PCR |
| <i>CcCS</i> -QR        | TGCCGCTGGAATAACACCTC                 | 58    | qRT-PCR |
| <i>CcCAD</i> -QF       | TATGGCACCAGAACAAAGCAG                | 58    | qRT-PCR |
| <i>CcCAD</i> -QR       | CTCCAAGTCCCAATATTCCAC                | 58    | qRT-PCR |
| <i>CcCCR1</i> -QF      | GATCCAGAACAAATGGTGGAGC               | 58    | qRT-PCR |
| <i>CcCCR1</i> -QR      | CCAGCAAGTCTCGTCCACAAC                | 58    | qRT-PCR |
| <i>CcCCR2</i> -QF      | AATGGTGGAGCCAGCAGTTAT                | 58    | qRT-PCR |
| <i>CcCCR2</i> -QR      | GACAGCTCCAATTGAGGAAGTG               | 58    | qRT-PCR |
