# Supplementary material for: Genome-Wide Identification of WRKY Gene Family and Functional Characterization of CcWRKY25 in Capsicum chinense
Source: MDPI journal article supplement (doi:10.3390/ijms241411389), 2023-07-13
Supplement: s1 [file s1]

Figure S1 The detection of T2 generation transgenic *Arabidopsis*

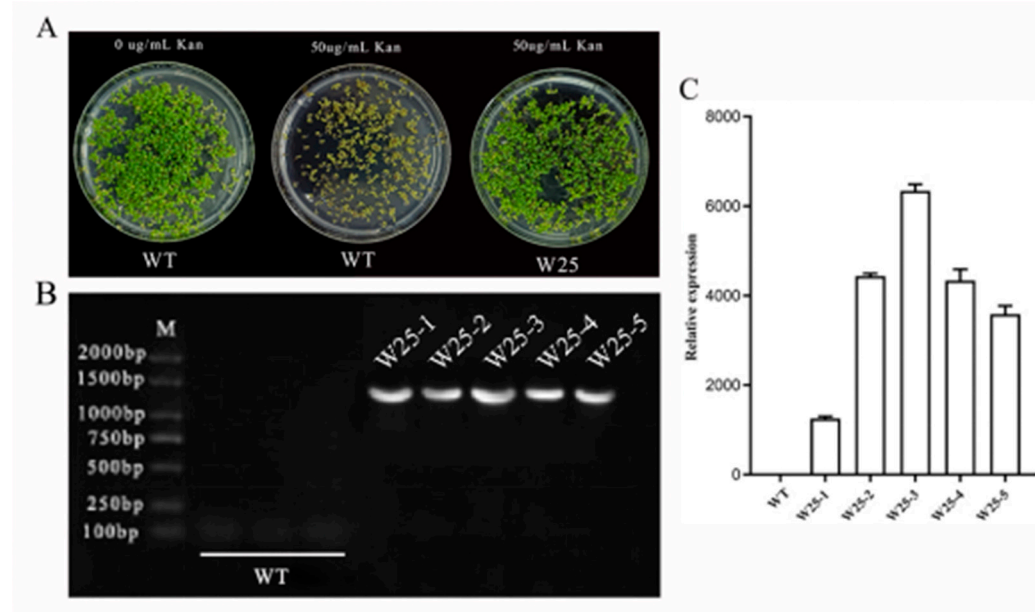

Figure S1 T2 generation transgenic *Arabidopsis* detection. (A) T2 generation resistance screening. (B) T2 generation transgenic *Arabidopsis* PCR detection; (C) qRT-PCR analysis of T2 transgenic *Arabidopsis* of W25. Data on the bars marked without the same lowercase letter indicated significant differences at  $p \leq 0.05$ .
