# Supplementary material for: Genome-Wide Identification of WRKY Gene Family and Functional Characterization of CcWRKY25 in Capsicum chinense
Source: MDPI journal article supplement (doi:10.3390/ijms241411389), 2023-07-13
Supplement: s1 [file s1]

Table S2 Basic information on WRKY transcription factors of *C. chinense*

| Gene ID          | Rename   | Physical position |                      | Amino acids /aa | Molecular weight /Da | pI   | Subcellular localization |
|------------------|----------|-------------------|----------------------|-----------------|----------------------|------|--------------------------|
|                  |          | Chromo            | Start-terminus sites |                 |                      |      |                          |
|                  |          | some              |                      |                 |                      |      |                          |
| BC332_20348_mrna | CcWRKY1  | 1                 | 36308-51984          | 255             | 28804.77             | 9.35 | Nucleus                  |
| BC332_07456_mrna | CcWRKY2  | 3                 | 84774742-84783213    | 616             | 66538.80             | 6.23 | Nucleus                  |
| BC332_05995_mrna | CcWRKY3  | 2                 | 166378711-166381304  | 378             | 41986.85             | 8.22 | Nucleus                  |
| BC332_21231_mrna | CcWRKY4  | 8                 | 138776205-138777458  | 223             | 25052.45             | 6.22 | Nucleus                  |
| BC332_27666_mrna | CcWRKY5  | 11                | 21574210-21579280    | 491             | 53750.29             | 6.81 | Nucleus                  |
| BC332_26239_mrna | CcWRKY6  | 10                | 203654835-203657765  | 464             | 51333.71             | 9.47 | Nucleus                  |
| BC332_25775_mrna | CcWRKY7  | 10                | 148383749-148385945  | 382             | 42773.57             | 6.46 | Nucleus                  |
| BC332_31321_mrna | CcWRKY8  | 12                | 221395467-221396894  | 304             | 33432.36             | 9.12 | Nucleus                  |
| BC332_00163_mrna | CcWRKY9  | 1                 | 2551035-2562488      | 247             | 27907.08             | 5.91 | Nucleus                  |
| BC332_05111_mrna | CcWRKY10 | 2                 | 150829065-150831579  | 548             | 59550.85             | 6.90 | Nucleus                  |
| BC332_18978_mrna | CcWRKY11 | 7                 | 180224745-180228814  | 526             | 58352.32             | 6.22 | Nucleus                  |
| BC332_03504_mrna | CcWRKY12 | 2                 | 68944868-68946668    | 219             | 24264.82             | 9.58 | Nucleus                  |
| BC332_31327_mrna | CcWRKY13 | 12                | 221520630-221522187  | 328             | 35905.08             | 9.11 | Nucleus                  |
| BC332_00268_mrna | CcWRKY14 | 1                 | 4084058-4085764      | 372             | 42306.88             | 5.85 | Nucleus                  |
| BC332_31320_mrna | CcWRKY15 | 12                | 221376750-221381740  | 272             | 30645.98             | 9.21 | Nucleus                  |
| BC332_02470_mrna | CcWRKY16 | 1                 | 191946568-191948995  | 330             | 37026.51             | 6.08 | Nucleus                  |
| BC332_23375_mrna | CcWRKY17 | 9                 | 42067585-42069534    | 214             | 24121.03             | 8.26 | Nucleus                  |
| BC332_20450_mrna | CcWRKY18 | 8                 | 8055073-8056742      | 331             | 35757.94             | 9.80 | Nucleus                  |
| BC332_34107_mrna | CcWRKY19 | NA                | 54044-58678          | 418             | 46993.26             | 7.85 | Nucleus                  |
| BC332_07394_mrna | CcWRKY20 | 3                 | 62002983-62005547    | 300             | 34655.65             | 5.85 | Nucleus                  |
| BC332_04245_mrna | CcWRKY21 | 2                 | 131518275-131520003  | 321             | 36359.41             | 6.73 | Nucleus                  |
| BC332_20350_mrna | CcWRKY22 | 8                 | 3781832-3783574      | 364             | 41265.65             | 6.22 | Nucleus                  |
| BC332_19791_mrna | CcWRKY23 | 7                 | 225163160-225166675  | 747             | 81158.18             | 5.95 | Nucleus                  |
| BC332_31325_mrna | CcWRKY24 | 12                | 221469539-221471028  | 303             | 33542.42             | 8.73 | Nucleus                  |
| BC332_21563_mrna | CcWRKY25 | 8                 | 173822025-173823936  | 330             | 37177.80             | 5.90 | Nucleus                  |
| BC332_32647_mrna | CcWRKY26 | NA                | 927922-930850        | 464             | 51543.90             | 9.58 | Nucleus                  |
| BC332_31328_mrna | CcWRKY27 | 12                | 221526473-221528037  | 277             | 30605.43             | 9.53 | Nucleus                  |
| BC332_19439_mrna | CcWRKY28 | 7                 | 215024124-215038310  | 297             | 31411.75             | 6.18 | Nucleus                  |
| BC332_18081_mrna | CcWRKY30 | 7                 | 9240329-9248625      | 456             | 49741.78             | 9.05 | Nucleus                  |
| BC332_20349_mrna | CcWRKY31 | 8                 | 3773584-3777220      | 307             | 34558.20             | 7.66 | Nucleus                  |
| BC332_28231_mrna | CcWRKY32 | 11                | 108141570-108143030  | 170             | 19605.29             | 9.50 | Nucleus                  |
| BC332_06185_mrna | CcWRKY33 | 2                 | 169294454-169295978  | 160             | 18575.88             | 9.45 | Nucleus                  |
| BC332_33094_mrna | CcWRKY34 | NA                | 403319-405163        | 339             | 37987.08             | 9.76 | Nucleus                  |
| BC332_20351_mrna | CcWRKY35 | 8                 | 3785892-3787500      | 281             | 32009.62             | 8.70 | Nucleus                  |
| BC332_11915_mrna | CcWRKY36 | 4                 | 225094831-225096315  | 351             | 38781.73             | 9.67 | Nucleus                  |
| BC332_19890_mrna | CcWRKY37 | 7                 | 226606299-226611823  | 583             | 63087.19             | 7.93 | Nucleus                  |
| BC332_24379_mrna | CcWRKY38 | 9                 | 245785900-245789969  | 606             | 66677.73             | 6.32 | Nucleus                  |
| BC332_16509_mrna | CcWRKY39 | 6                 | 217866888-217868385  | 361             | 39758.40             | 8.42 | Nucleus                  |
| BC332_08895_mrna | CcWRKY40 | 3                 | 246864717-246868512  | 550             | 61118.11             | 8.17 | Nucleus                  |
| BC332_04408_mrna | CcWRKY41 | 2                 | 135650434-135651876  | 306             | 34295.12             | 5.85 | Nucleus                  |

| Gene ID          | Rename   | Physical position |                      | Amino acids /aa | Molecular weight /Da | pI    | Subcellular localization |
|------------------|----------|-------------------|----------------------|-----------------|----------------------|-------|--------------------------|
|                  |          | Chromosome        | Start-terminus sites |                 |                      |       |                          |
| BC332_31593_mrna | CcWRKY42 | NA                | 369481-372422        | 640             | 69603.83             | 6.43  | Nucleus                  |
| BC332_23442_mrna | CcWRKY43 | 9                 | 57488795-57492472    | 546             | 60478.28             | 8.10  | Nucleus                  |
| BC332_08364_mrna | CcWRKY44 | 3                 | 231673998-231674783  | 261             | 29419.12             | 6.31  | Nucleus                  |
| BC332_32474_mrna | CcWRKY45 | NA                | 256249-258355        | 498             | 55440.33             | 6.09  | Nucleus                  |
| BC332_00165_mrna | CcWRKY46 | 1                 | 2600409-2602960      | 218             | 25126.40             | 9.08  | Nucleus                  |
| BC332_13551_mrna | CcWRKY47 | 5                 | 155534269-155543016  | 230             | 25353.96             | 5.89  | Nucleus                  |
| BC332_25469_mrna | CcWRKY48 | 10                | 72993366-73000272    | 315             | 36159.48             | 6.36  | Nucleus                  |
| BC332_31324_mrna | CcWRKY49 | 12                | 221424066-221425345  | 255             | 27607.03             | 10.14 | Nucleus                  |
| BC332_10771_mrna | CcWRKY50 | 4                 | 64942506-64951288    | 487             | 54013.51             | 6.77  | Nucleus                  |
| BC332_05559_mrna | CcWRKY51 | 2                 | 159421746-159423199  | 324             | 35764.71             | 9.63  | Nucleus                  |
| BC332_24089_mrna | CcWRKY52 | 9                 | 214737683-214739678  | 330             | 36980.79             | 6.50  | Nucleus                  |
| BC332_33123_mrna | CcWRKY53 | NA                | 456232-464785        | 718             | 79413.31             | 8.16  | Nucleus                  |
| BC332_24920_mrna | CcWRKY54 | 10                | 3807861-3810851      | 760             | 82646.36             | 6.82  | Nucleus                  |
| BC332_14611_mrna | CcWRKY55 | 6                 | 2758655-2760586      | 344             | 38628.63             | 9.59  | Nucleus                  |
| BC332_26043_mrna | CcWRKY56 | 10                | 187385869-187388907  | 232             | 26729.07             | 7.62  | Nucleus                  |
| BC332_03416_mrna | CcWRKY57 | 2                 | 53330966-53335736    | 445             | 49221.38             | 5.87  | Nucleus                  |
| BC332_14356_mrna | CcWRKY58 | 5                 | 234303371-234306738  | 504             | 56581.09             | 7.17  | Nucleus                  |
| BC332_08266_mrna | CcWRKY59 | 3                 | 224295161-224296393  | 336             | 38605.17             | 5.67  | Nucleus                  |
| BC332_27634_mrna | CcWRKY60 | 11                | 20227698-20229166    | 320             | 35419.11             | 9.07  | Nucleus                  |
| BC332_27642_mrna | CcWRKY61 | 11                | 20574719-20580301    | 307             | 33760.09             | 5.64  | Nucleus                  |
| BC332_19744_mrna | CcWRKY62 | 7                 | 224124556-224127710  | 319             | 36653.20             | 6.65  | Nucleus                  |
| BC332_08319_mrna | CcWRKY63 | 3                 | 228474750-228476098  | 391             | 43793.14             | 6.15  | Nucleus                  |
| BC332_11349_mrna | CcWRKY64 | 4                 | 196837600-196839730  | 223             | 25792.06             | 6.40  | Nucleus                  |
| BC332_30500_mrna | CcWRKY65 | 11                | 107943116-107948116  | 233             | 27084.36             | 8.90  | Nucleus                  |
| BC332_03843_mrna | CcWRKY66 | 2                 | 110989910-110995739  | 455             | 49881.67             | 6.99  | Nucleus                  |
| BC332_30517_mrna | CcWRKY67 | 11                | 109678178-109693367  | 186             | 21479.71             | 7.09  | Nucleus                  |
| BC332_21090_mrna | CcWRKY68 | 8                 | 106992258-106993621  | 166             | 19027.04             | 6.08  | Nucleus                  |
| BC332_03008_mrna | CcWRKY69 | 1                 | 237239869-237244154  | 239             | 26746.32             | 8.16  | Nucleus                  |
| BC332_02652_mrna | CcWRKY70 | 1                 | 207114788-207116426  | 244             | 27048.20             | 5.82  | Nucleus                  |
| BC332_14014_mrna | CcWRKY71 | 5                 | 225255306-225257798  | 308             | 34785.58             | 5.52  | Nucleus                  |
| BC332_21532_mrna | CcWRKY72 | 8                 | 170588740-170590246  | 414             | 45715.72             | 6.76  | Nucleus                  |
| BC332_21277_mrna | CcWRKY73 | 8                 | 150643592-150646243  | 264             | 30158.91             | 6.37  | Nucleus                  |
